# Supplementary figures and images for: IL-10 protects against OPC ferroptosis by regulating lipid reactive oxygen species levels post stroke
Source: PubMed Central journal article supplement — Redox Biol. 2023 Dec 5;69:102982. doi: 10.1016/j.redox.2023.102982 (PMC10755589; doi:10.1016/j.redox.2023.102982), 2023-12-05

Fig 2.

A

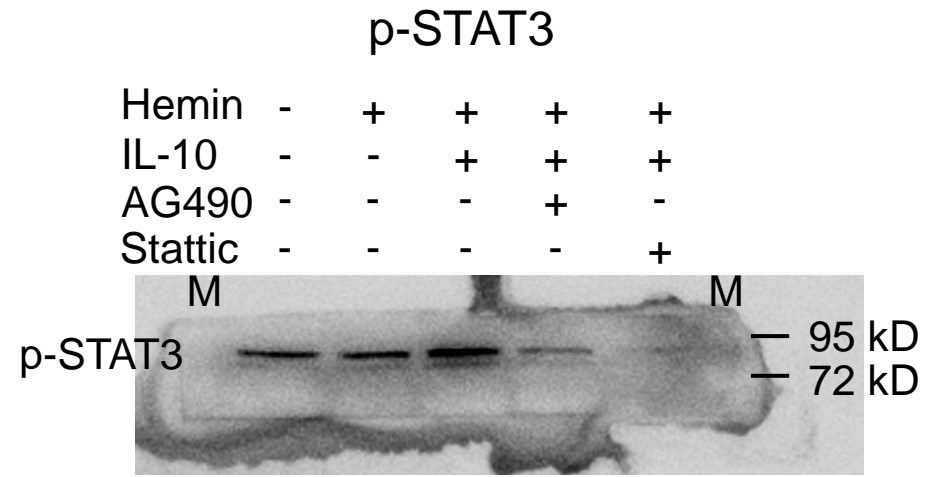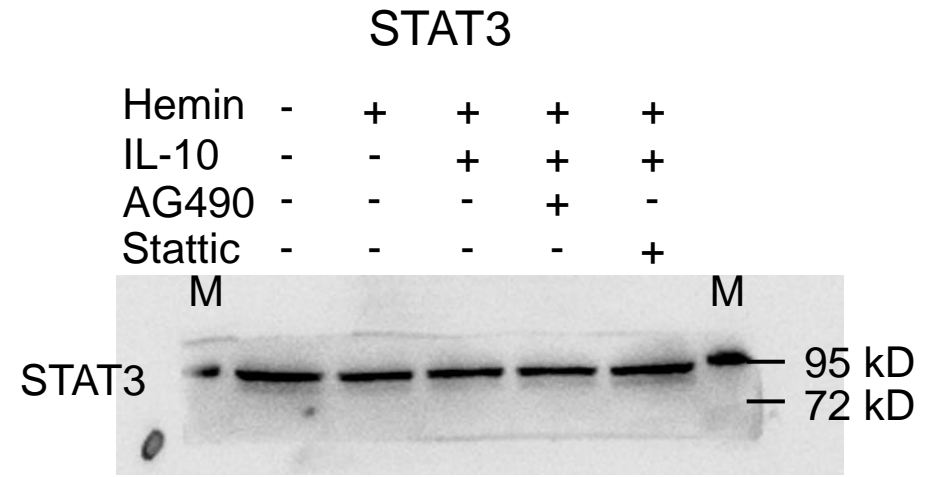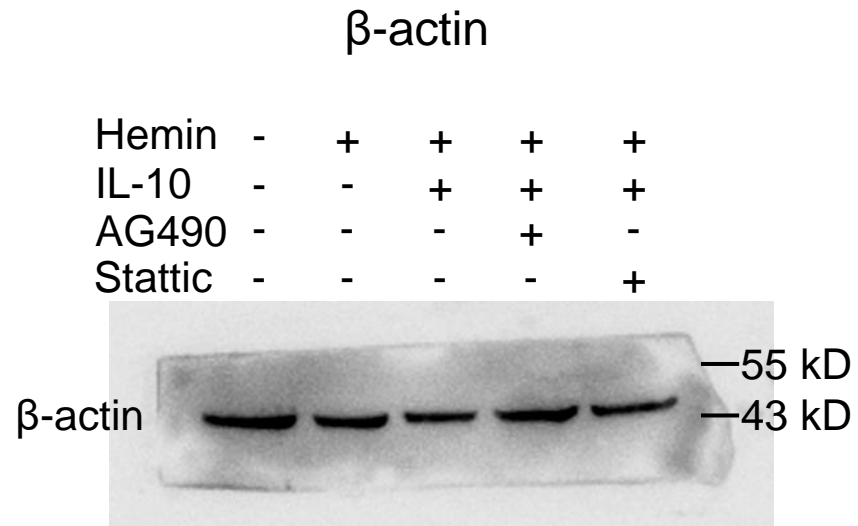

Fig 2.

B

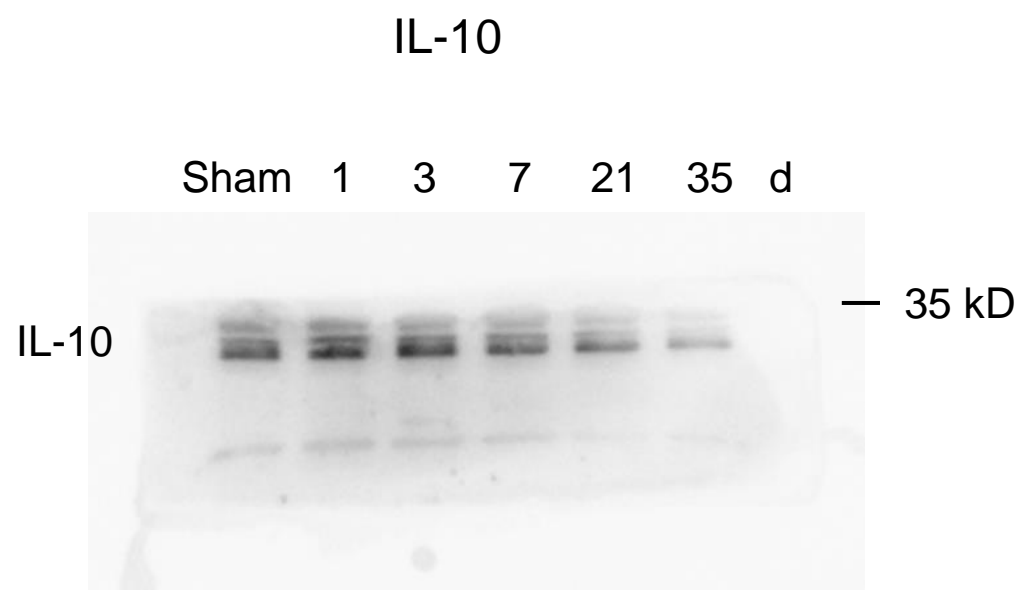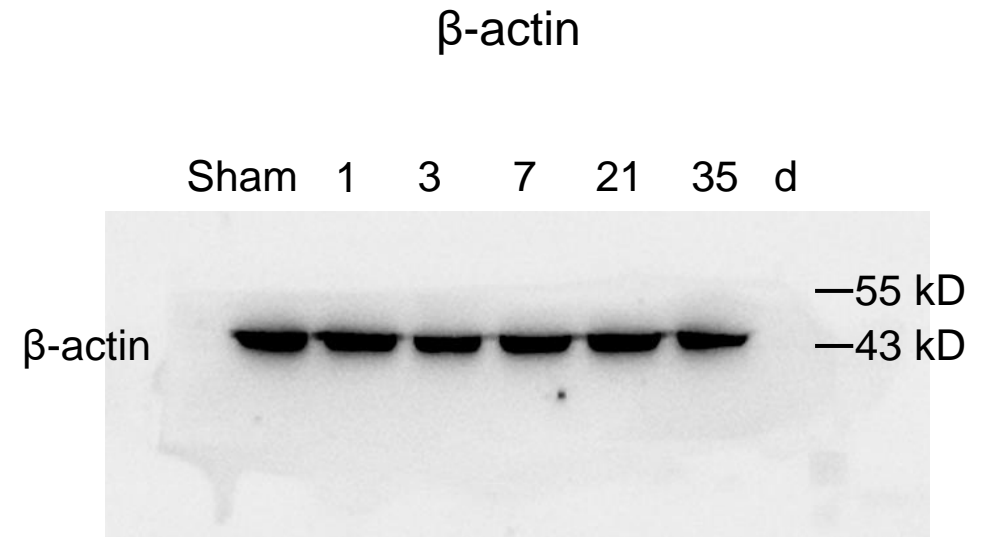

Fig 2.

B

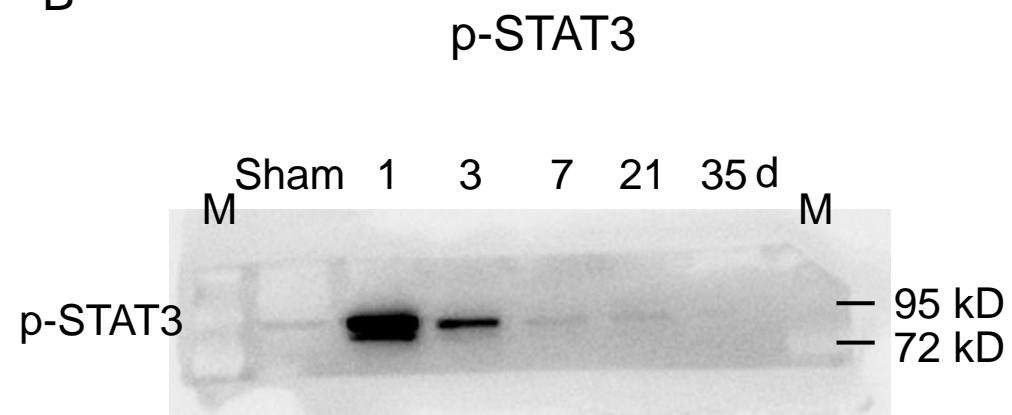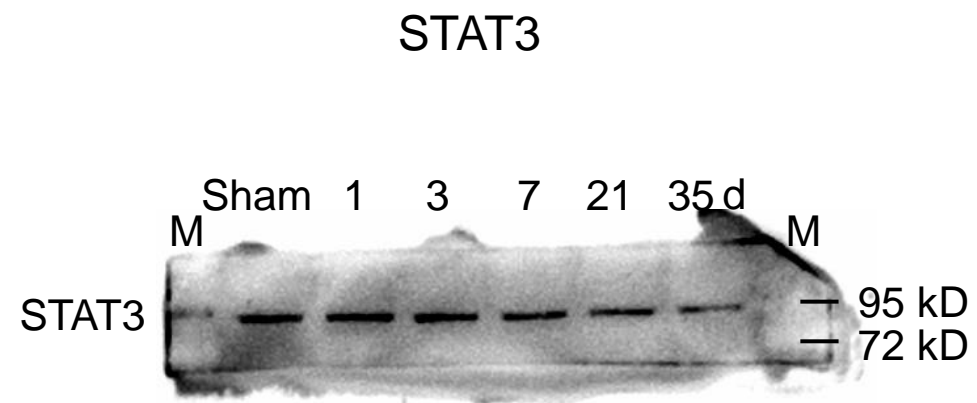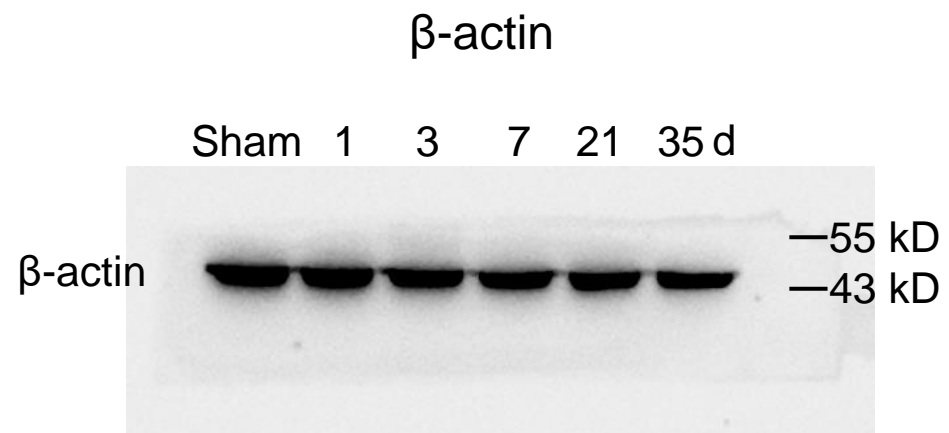

Fig 4.

A

DLK1

p-AMPK

AMPK

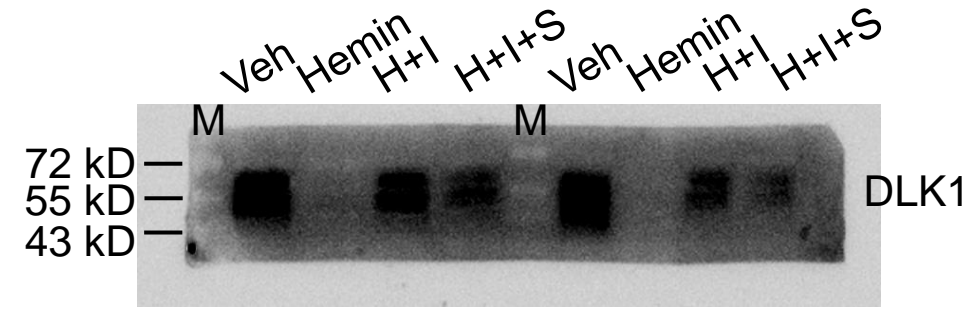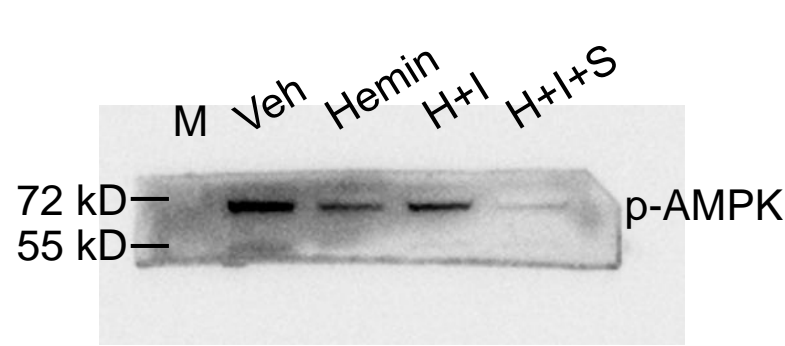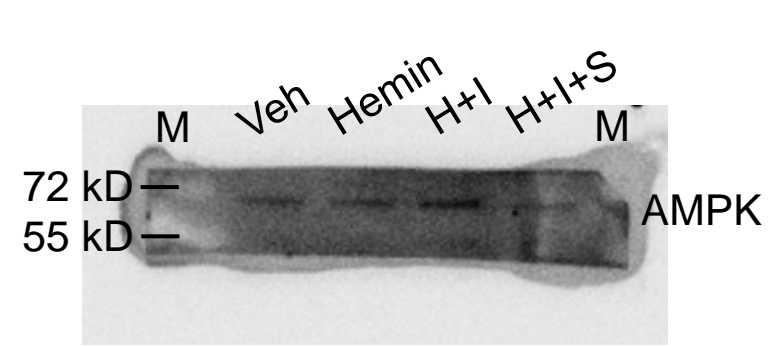

p-ACC

ACC

$\beta$ -actin

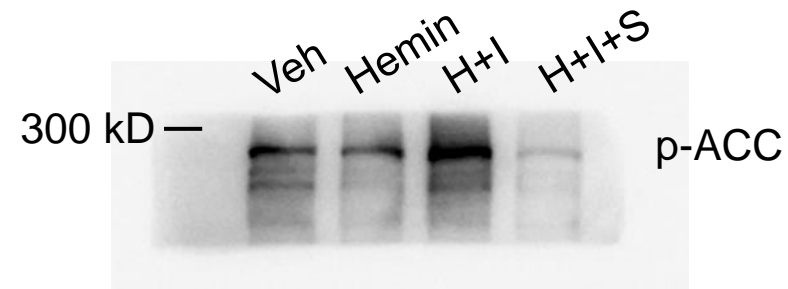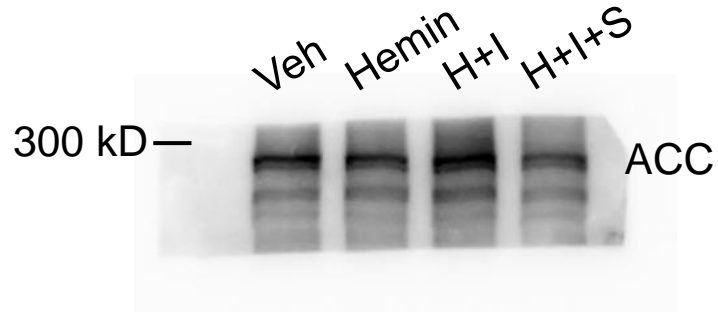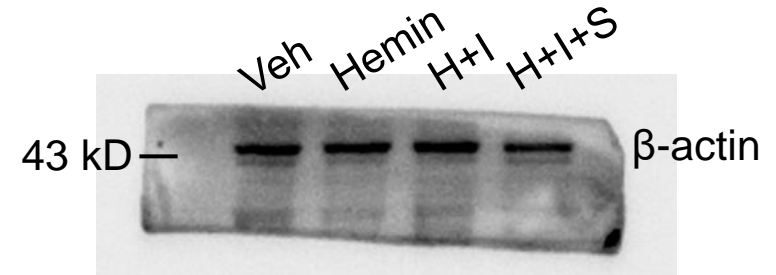

Fig 4.

B

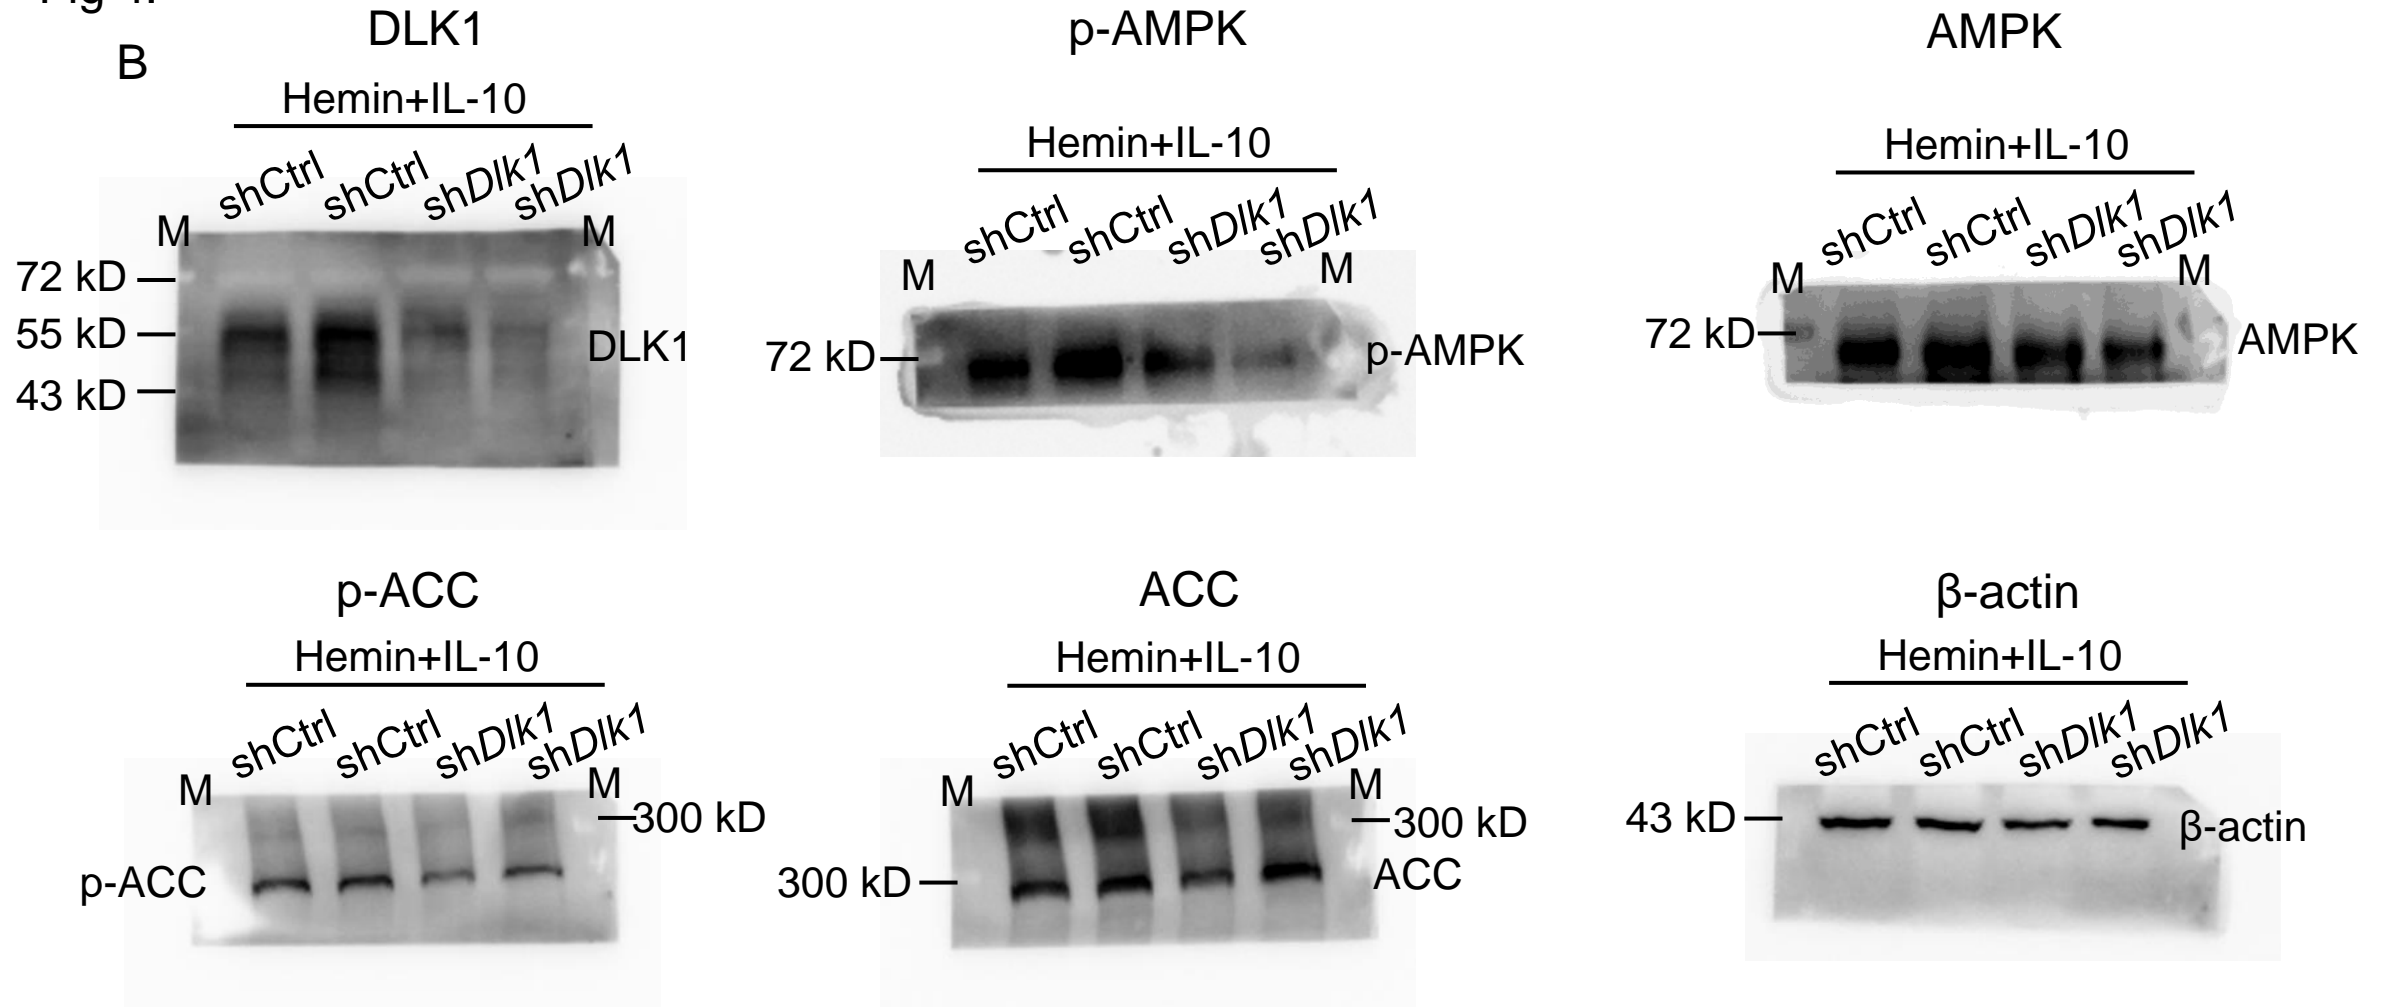

Fig S1.

B

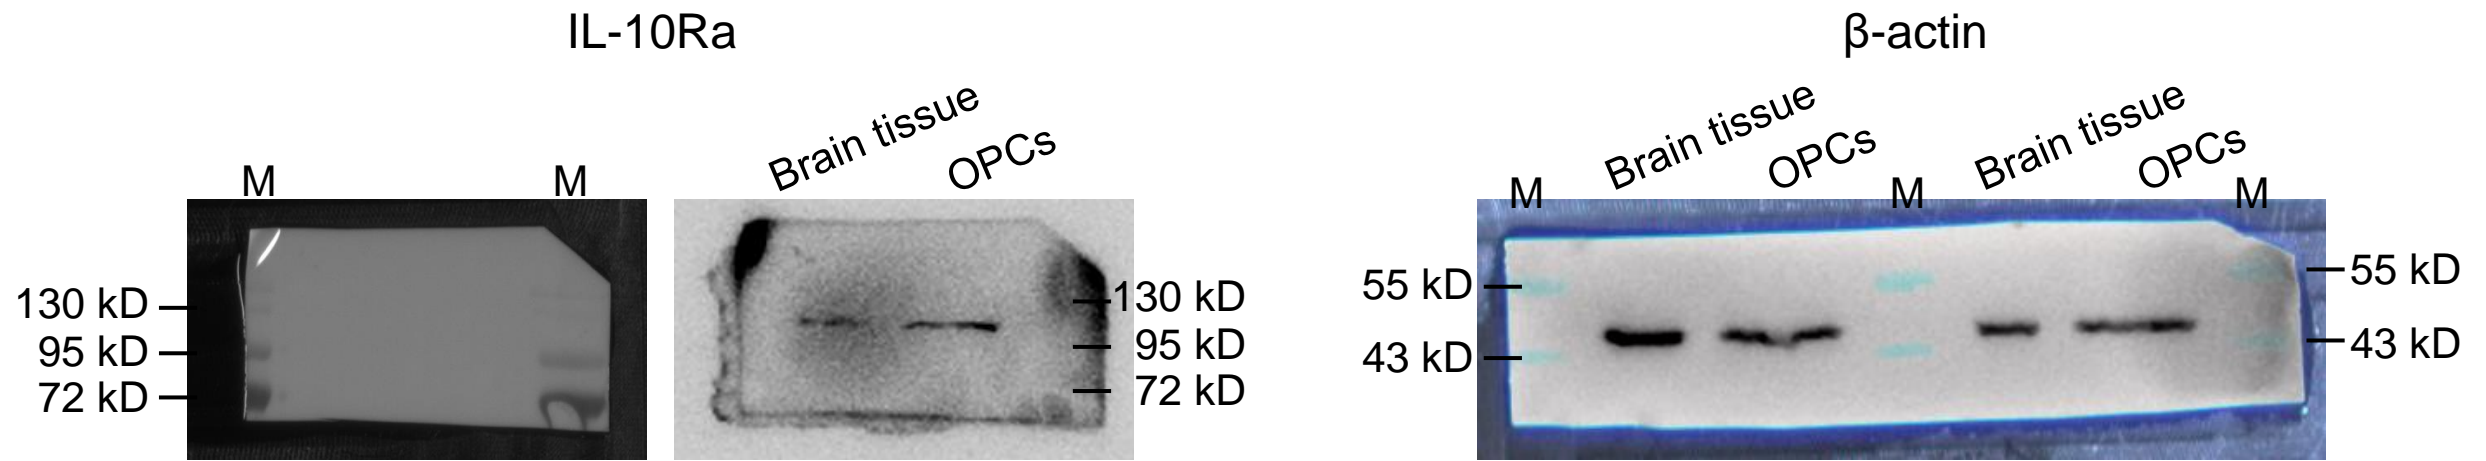

Fig S1.

C

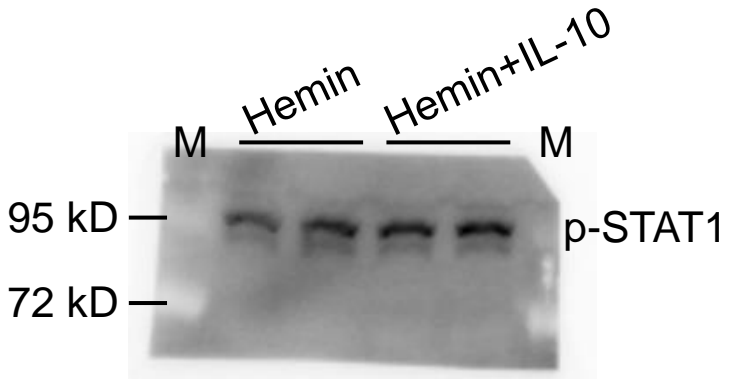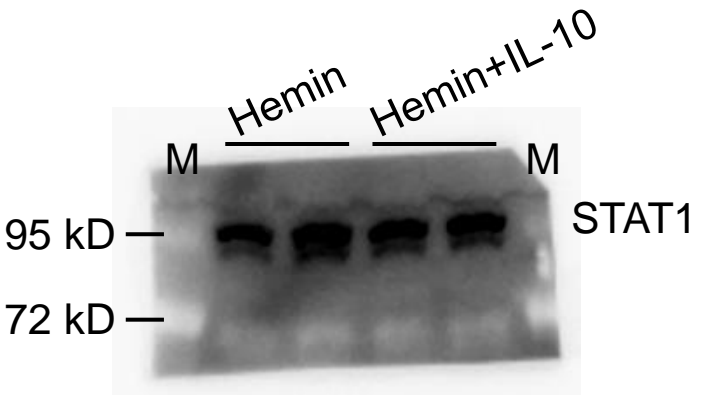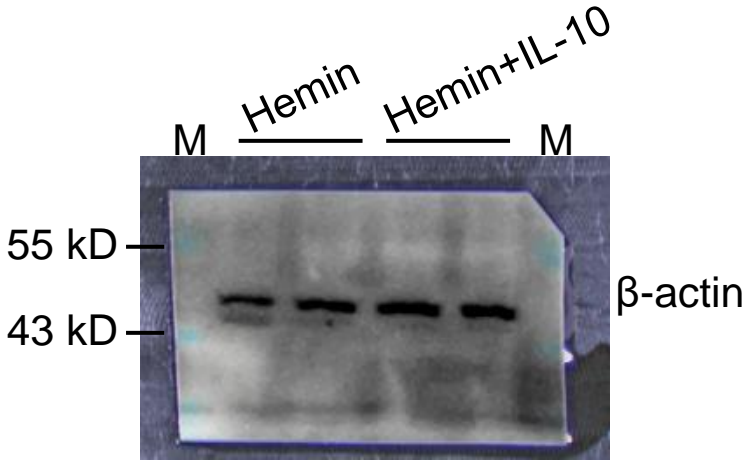

Fig S1.

D

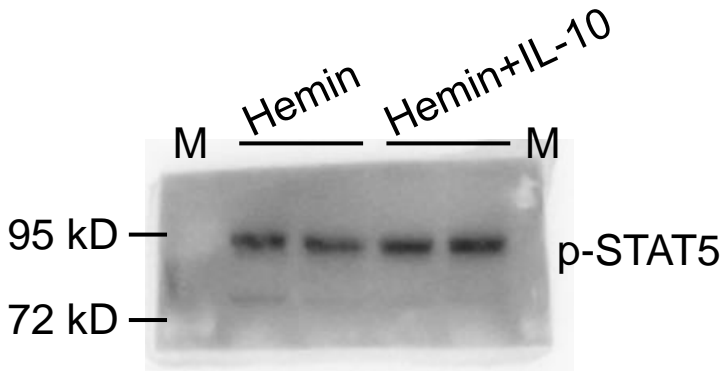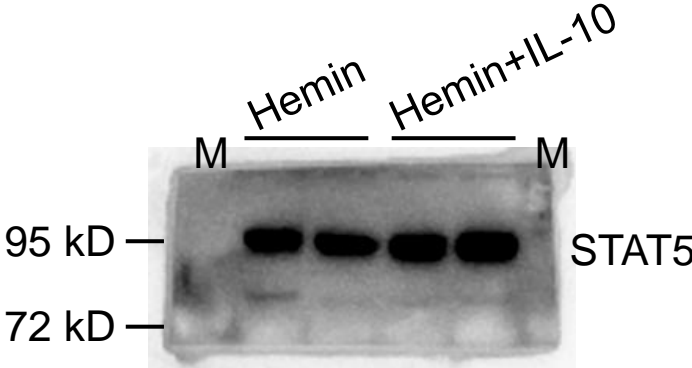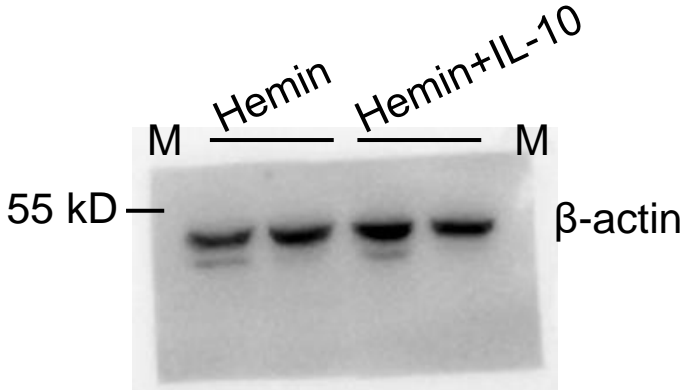



Fig S2.  
C

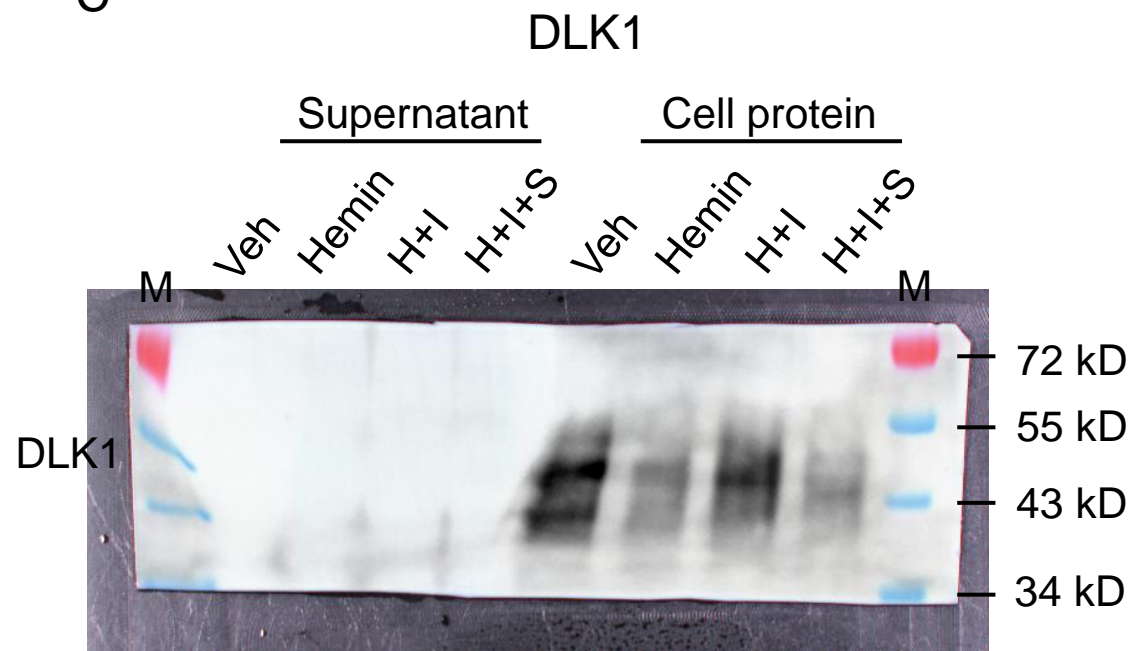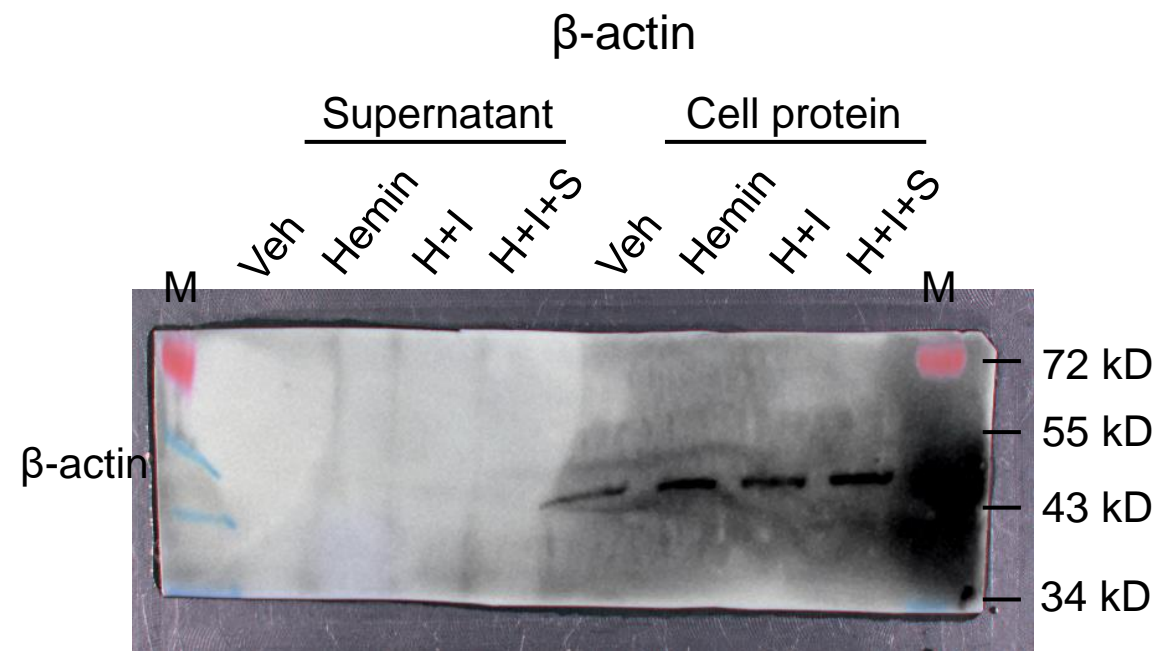

Supplement: mmc4.pdf [file mmc4.pdf]
